# Supplementary material
Source: publisher site journal article supplement (https://www.e-cmh.org/upload/media/cmh-2022-0330-Supplementary-3.pdf)
Supplement: Supplementary file 1 [file cmh-2022-0330-Supplementary-3.pdf]

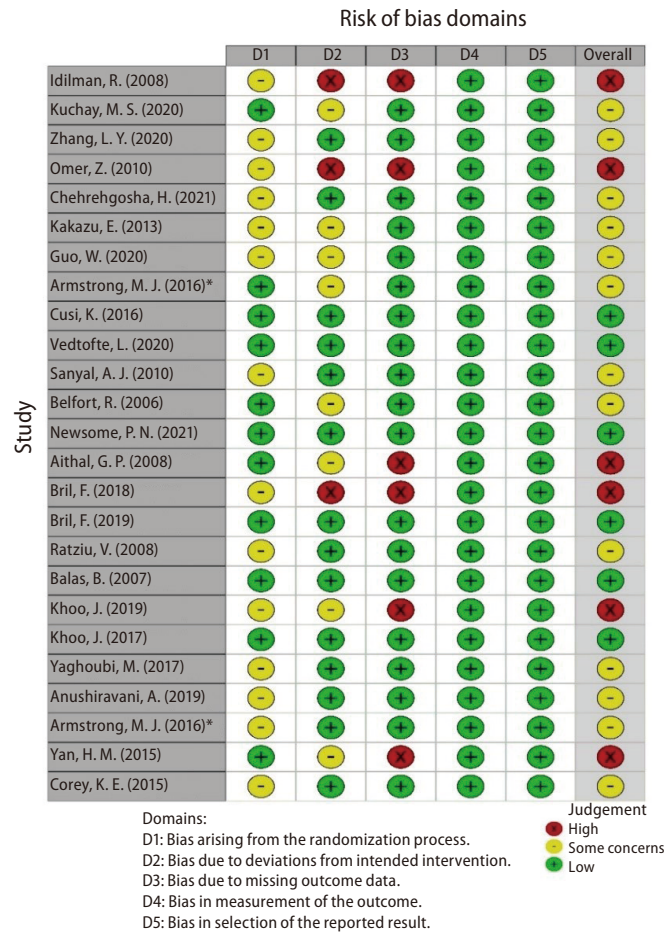

A

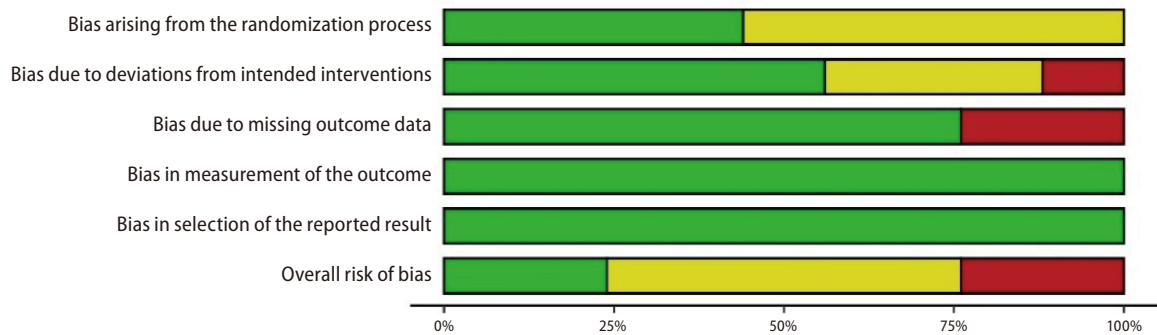

B

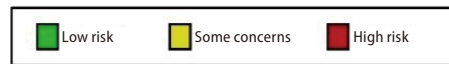

**Supplementary Material 3.** Evaluation of the risk of bias. (A) Risk of bias summary and (B) risk of bias graph according to the Cochrane “Risk of Bias” assessment tool, visualized using the Robvis program. \*These are different articles.
